# Supplementary material for: Ca2+ entry through NaV channels generates submillisecond axonal Ca2+ signaling
Source: eLife journal article supplement (doi:10.7554/elife.54566), 2020-06-17
Supplement: supp [file elife-54566-supp-v1.zip]

Archive with 14 entries (14 files):
- elife_poa_e54566_Figure_1_source_data_1.xlsx
- elife_poa_e54566_Figure_2_source_data_1.xlsx
- elife_poa_e54566_Figure_3_source_data_1.xlsx
- elife_poa_e54566_Figure_4_source_data_1.xlsx
- elife_poa_e54566_Figure_5_source_data_1.xlsx
- elife_poa_e54566_Figure_6_source_data_1.xlsx
- elife_poa_e54566_Figure_7_source_data_1.xlsx
- elife_poa_e54566_Transparent_Reporting_File.docx
- elife_poa_e54566_Figure_1_figure_supplement_1.pdf
- elife_poa_e54566_Figure_5_figure_supplement_1.pdf
- elife_poa_e54566_Figure_6_figure_supplement_1.pdf
- elife_poa_e54566_Figure_8_figure_supplement_1.pdf
- elife_poa_e54566_Figure_8_figure_supplement_2.pdf
- elife_poa_e54566_Table_1_source_data_1.xlsx
