# Supplementary material for: Ca2+ entry through NaV channels generates submillisecond axonal Ca2+ signaling
Source: eLife journal article supplement (doi:10.7554/elife.54566), 2020-06-17
Supplement: supp [file elife-54566-supp-v1.zip › elife_poa_e54566_Figure_1_figure_supplement_1.pdf]

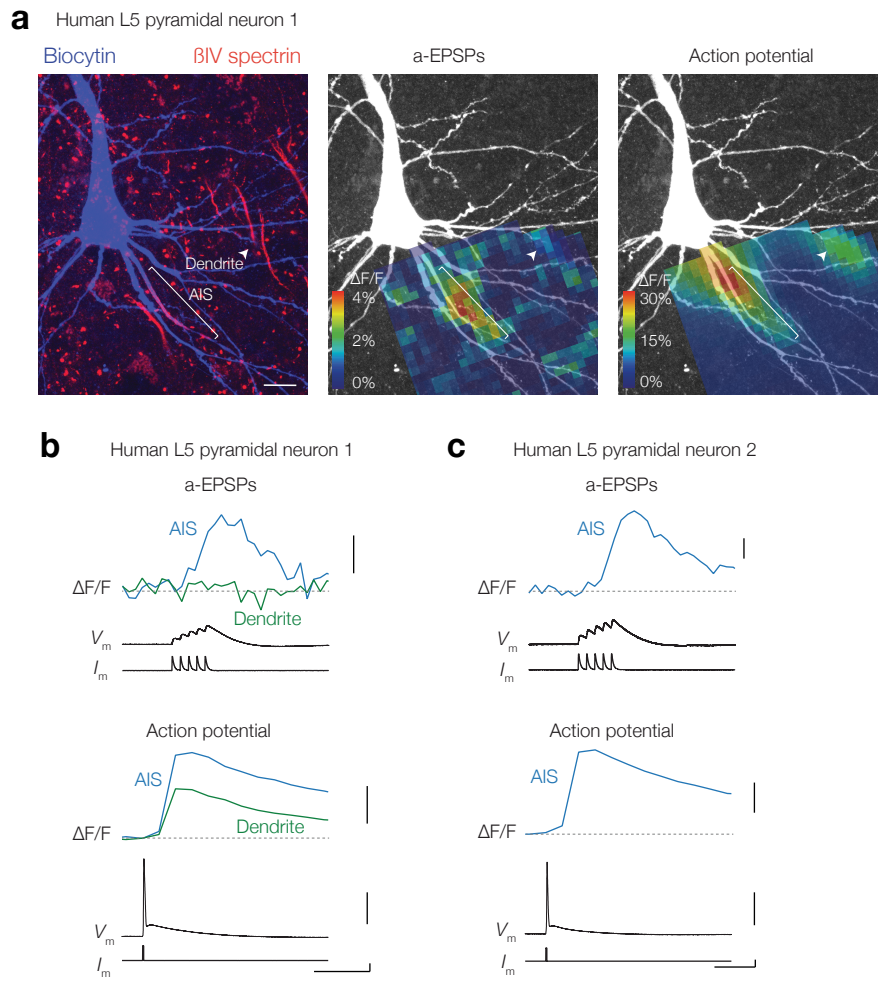

**Figure 1–figure supplement 1.** EPSP-evoked evoked  $\Delta[\text{Ca}^{2+}]_i$  in human layer 5 pyramidal neuron AIS
