# Supplementary material for: Ca2+ entry through NaV channels generates submillisecond axonal Ca2+ signaling
Source: eLife journal article supplement (doi:10.7554/elife.54566), 2020-06-17
Supplement: supp [file elife-54566-supp-v1.zip › elife_poa_e54566_Figure_1_source_data_1.xlsx]

## Sheet: Sheet1
	Figure 1-source data 1. Activity-dependent compartmentalized Ca2+ entry in layer 5 axons
1d	a-EPSP evoked ΔF/F per location
peak ΔF/F OGB-1	AIS (% ΔF/F)	internode (% ΔF/F)	hot-spot (% ΔF/F)	dendrite (% ΔF/F)
	9.9	0.4	8.6	0.081
	8.15	0.85	7.3	0.683
	17.7	1.12	7	0.511
	16.2	-0.66	11	0.48
	10	2.8	13
	10.5	2.2	6.3
	12.7	1.11	13.7
	14	2.21	9.3
	6.9	0.64	7.2
	5.199
	10.435
	8.67
	15.339
n	13	9	9	4
mean	11.2072	1.18556	9.26667	0.43875
sem	1.04047	0.356067	0.906152	0.127333
ANOVA summary
F	32.76
P value	<0.0001
P value summary	****
Significant diff. among means (P < 0.05)?	Yes
R square	0.7602
ANOVA table	SS	DF	MS	F (DFn, DFd)	P value
Treatment (between columns)	752.5	3	250.8	F (3, 31) = 32.76	P<0.0001
Residual (within columns)	237.3	31	7.656
Total	989.8	34
Tukey's multiple comparisons test	Mean Diff.	95.00% CI of diff.	Significant?	Summary	Adjusted P Value
AIS vs. internode	10.02	6.765 to 13.28	Yes	****	<0.0001	A-B
AIS vs. hot-spot	1.94	-1.316 to 5.197	No	ns	0.384	A-C
AIS vs. dendrite	10.77	6.475 to 15.06	Yes	****	<0.0001	A-D
internode vs. hot-spot	-8.081	-11.62 to -4.541	Yes	****	<0.0001	B-C
internode vs. dendrite	0.7468	-3.766 to 5.259	No	ns	0.9693	B-D
hot-spot vs. dendrite	8.828	4.315 to 13.34	Yes	****	<0.0001	C-D
Test details	Mean 1	Mean 2	Mean Diff.	SE of diff.	n1	n2	q	DF
AIS vs. internode	11.21	1.186	10.02	1.2	13	9	11.81	31
AIS vs. hot-spot	11.21	9.267	1.94	1.2	13	9	2.287	31
AIS vs. dendrite	11.21	0.4388	10.77	1.582	13	4	9.626	31
internode vs. hot-spot	1.186	9.267	-8.081	1.304	9	9	8.762	31
internode vs. dendrite	1.186	0.4388	0.7468	1.663	9	4	0.6352	31
hot-spot vs. dendrite	9.267	0.4388	8.828	1.663	9	4	7.509	31
1d	AP evoked ΔF/F per location
peak ΔF/F OGB-1	AIS (% ΔF/F)	internode (% ΔF/F)	hot-spot (% ΔF/F)	dendrite (% ΔF/F)
	32	69	15.5	49.422
	26.5	64.5	24.5	65.51
	21	33	21	48.012
	44	70	20	59.432
	52	71	36.7
	40	58	15.28
	29.669
	37.039
	27.949
	34.172
n	10	6	6	4
mean	34.4329	60.9167	22.1633	55.594
sem	2.89062	5.91667	3.23825	4.16971
ANOVA summary
F	18.27
P value	<0.0001
P value summary	****
Significant diff. among means (P < 0.05)?	Yes
R square	0.7135
ANOVA table	SS	DF	MS	F (DFn, DFd)	P value
Treatment (between columns)	5792	3	1931	F (3, 22) = 18.27	P<0.0001
Residual (within columns)	2325	22	105.7
Total	8118	25
Tukey's multiple comparisons test	Mean Diff.	95.00% CI of diff.	Significant?	Summary	Adjusted P Value
AIS vs. in-between	-26.48	-41.23 to -11.74	Yes	***	0.0003	A-B
AIS vs. hot-spot	12.27	-2.473 to 27.01	No	ns	0.126	A-C
AIS vs. dendrite	-21.16	-38.05 to -4.271	Yes	*	0.0106	A-D
in-between vs. hot-spot	38.75	22.27 to 55.24	Yes	****	<0.0001	B-C
in-between vs. dendrite	5.323	-13.11 to 23.75	No	ns	0.8527	B-D
hot-spot vs. dendrite	-33.43	-51.86 to -15.00	Yes	***	0.0003	C-D
Test details	Mean 1	Mean 2	Mean Diff.	SE of diff.	n1	n2	q	DF
AIS vs. in-between	34.43	60.92	-26.48	5.309	10	6	7.055	22
AIS vs. hot-spot	34.43	22.16	12.27	5.309	10	6	3.268	22
AIS vs. dendrite	34.43	55.59	-21.16	6.082	10	4	4.92	22
in-between vs. hot-spot	60.92	22.16	38.75	5.936	6	6	9.233	22
in-between vs. dendrite	60.92	55.59	5.323	6.636	6	4	1.134	22
hot-spot vs. dendrite	22.16	55.59	-33.43	6.636	6	4	7.124	22
