# Supplementary material for: Ca2+ entry through NaV channels generates submillisecond axonal Ca2+ signaling
Source: eLife journal article supplement (doi:10.7554/elife.54566), 2020-06-17
Supplement: supp [file elife-54566-supp-v1.zip › elife_poa_e54566_Figure_2_source_data_1.xlsx]

## Sheet: Sheet1
	Figure 2-source data 1. Giant saccular organelle amplifies activity-dependent Δ[Ca2+]i in the AIS
2b	synaptopodin fluorescence lenght vs ankyrin-G fluorescence length, paired
	AnkG (µm)	Synpo (µm)
	38.72	37.16
	35.53	35.52
	33.21	32.49
	40.45	39.98
	32.51	31.76
	34.51	33.78
	35.01	32.5
	37.12	36.71
	28.18	27.23
	36.23	35.49
	30.24	29.8
	29.16	29.81
	36.78	36.34
	36.54	36.17
	27.75	26.43
	31.46	30.38
	31.83	30.13
	36.47	35.92
	31.55	30.48
Linear regression
Goodness of Fit
R square	0.966
Sy.x	0.6972
Is slope significantly non-zero?
F	482.9
DFn, DFd	1, 17
P value	<0.0001
Deviation from zero?	Significant
Equation	Y = 1.005*X - 0.9532
95% Confidence Intervals
Slope	0.9081 to 1.101
Y-intercept	-4.236 to 2.329
X-intercept	-2.564 to 3.849
2d	a-EPSP evoked ΔF/F in AIS, control vs. ryanodine + heparin, paired
peak ΔF/F OGB-1	control (% ΔF/F)	r + h (% ΔF/F)		fraction of control (%)
	40.634	10.713		26.3646
	14.811	4.732		31.9492
	33.607	20.018		59.565
	12.552	5.342		42.559
	19.917	14.7		73.8063
n	5	5		5
mean	24.3042	11.101	% ΔF/F	46.8488	%	53.1512	% reduction
sem	5.48036	2.88398	% ΔF/F	8.79889	%
Ratio paired t test
P value	0.006
P value summary	**
Significantly different (P < 0.05)?	Yes
One- or two-tailed P value?	One-tailed
t, df	t=4.360, df=4
Number of pairs	5
2d	AP evoked ΔF/F in AIS, control vs. ryanodine + heparin, paired
peak ΔF/F OGB-1	control (% ΔF/F)	r + h (% ΔF/F)		fraction of control (%)
	72.374	42.753		59.0723
	22.471	9.776		43.505
	37.883	42.982		113.46
	25.38	13.544		53.3649
	99.065	58.346		58.8967
n	5	5		5
mean	51.4346	33.4802	% ΔF/F	65.6597	%	34.3403	% reduction
sem	14.8467	9.36461	% ΔF/F	12.28	%
Ratio paired t test
P value	0.0206
P value summary	*
Significantly different (P < 0.05)?	Yes
One- or two-tailed P value?	One-tailed
t, df	t=2.969, df=4
Number of pairs	5
2e	rise time of AP evoked ΔF/F in AIS, control vs. ryanodine + heparin, paired
rise time	control (ms)	ryanodine + heparin (ms)
	2.6433	1.93257
	2.09835	2.1132
	2.63723	2.713
	2.42223	2.75795
	2.31502	1.95808
n	5	5
mean	2.42323	2.29496	ms
sem	0.102831	0.182616	ms
Paired t test
P value	0.5217
P value summary	ns
Significantly different (P < 0.05)?	No
One- or two-tailed P value?	Two-tailed
t, df	t=0.7013, df=4
Number of pairs	5
2e	decay time of AP evoked ΔF/F in AIS, control vs. ryanodine + heparin, paired
deacy time	control (ms)	ryanodine + heparin (ms)
	40.5563	41.4045
	76.5518	31.5271
	55.8262	66.3411
	107.572	82.6142
	216.34	123.155
n	5	5
mean	99.3693	69.0084	ms
sem	31.3249	16.2649	ms
Paired t test
P value	0.1759
P value summary	ns
Significantly different (P < 0.05)?	No
One- or two-tailed P value?	Two-tailed
t, df	t=1.642, df=4
Number of pairs	5
