# Supplementary material for: Ca2+ entry through NaV channels generates submillisecond axonal Ca2+ signaling
Source: eLife journal article supplement (doi:10.7554/elife.54566), 2020-06-17
Supplement: supp [file elife-54566-supp-v1.zip › elife_poa_e54566_Figure_3_source_data_1.xlsx]

## Sheet: Sheet1
	Figure 3-source data 1. CaV channels and NCX have a limited role in activity-dependent Ca2+ entry at the AIS
a-EPSPs
3b	EGTA	a-EPSP evoked ΔF/F in AIS, control vs. EGTA, paired
peak ΔF/F OGB-1	control (% ΔF/F)	EGTA (% ΔF/F)		fraction of control (%)
	5.512	0.404		7.32946
	2.251	0.068		3.02088
	4.019	0.325		8.08659
	1.404	0.263		18.7322
n	4	4		4
mean	3.2965	0.265	% ΔF/F	9.29228	%	90.7077	% reduction
sem	0.917654	0.0717252	% ΔF/F	3.33852	%
Ratio paired t test
P value	0.0031
P value summary	**
Significantly different (P < 0.05)?	Yes
One- or two-tailed P value?	One-tailed
t, df	t=6.904, df=3
Number of pairs	4
3b	TTA-P2	a-EPSP evoked ΔF/F in AIS, control vs. TTA-P2, paired
peak ΔF/F OGB-1	control (% ΔF/F)	TTA-P2 (% ΔF/F)		fraction of control (%)
	11.81	11.95		101.185
	11.64	10.93		93.9003
	16.6	12.77		76.9277
	10	10.2		102
n	4	4		4
mean	12.5125	11.4625	% ΔF/F	93.5034	%	6.49663	% reduction
sem	1.42229	0.564556	% ΔF/F	5.81748	%
Ratio paired t test
P value	0.1725
P value summary	ns
Significantly different (P < 0.05)?	No
One- or two-tailed P value?	One-tailed
t, df	t=1.118, df=3
Number of pairs	4
3b	nickel	a-EPSP evoked ΔF/F in AIS, control vs. nickel, paired
peak ΔF/F OGB-1	control (% ΔF/F)	nickel (% ΔF/F)		fraction of control (%)
	16.371	13.357		81.5894
	29.744	24.024		80.7692
	9.925	10.807		108.887
	4.266	2.305		54.0319
	26.956	23.406		86.8304
n	5	5		5
mean	17.4524	14.7798	% ΔF/F	82.4215	%	17.5785	% reduction
sem	4.86371	4.08225	% ΔF/F	8.74424	%
Ratio paired t test
P value	0.0633
P value summary	ns
Significantly different (P < 0.05)?	No
One- or two-tailed P value?	One-tailed
t, df	t=1.924, df=4
Number of pairs	5
3b	isradipine	a-EPSP evoked ΔF/F in AIS, control vs. Isradipine, paired
peak ΔF/F OGB-1	control (% ΔF/F)	isradipine (% ΔF/F)		fraction of control (%)
	6.91	7.16		103.618
	9.08667	8.6		94.6442
	10.685	13.775		128.919
	7.5	8.35		111.333
n	4	4		4
mean	8.54542	9.47125	% ΔF/F	109.629	%	-9.62862	% reduction
sem	0.848442	1.46857	% ΔF/F	7.27833	%
Ratio paired t test
P value	0.1408
P value summary	ns
Significantly different (P < 0.05)?	No
One- or two-tailed P value?	One-tailed
t, df	t=1.309, df=3
Number of pairs	4
3b	nimodipine	a-EPSP evoked ΔF/F in AIS, control vs. nimodipine, paired
peak ΔF/F OGB-1	control (% ΔF/F)	(% ΔF/F)		fraction of control (%)
	8.41	4.06		48.2759
	0.96	1.54		160.417
	9.52	10.4		109.244
	7.54	6.86		90.9814
n	4	4		4
mean	6.6075	5.715	% ΔF/F	102.229	%	-2.22941	% reduction
sem	1.92561	1.90241	% ΔF/F	23.2244	%
Ratio paired t test
P value	0.4054
P value summary	ns
Significantly different (P < 0.05)?	No
One- or two-tailed P value?	One-tailed
t, df	t=0.2612, df=3
Number of pairs	4
3b	TTA-P2 + Isradipine	a-EPSP evoked ΔF/F in AIS, control vs. TTA-P2 + Isradipine, paired
peak ΔF/F OGB-1	control (% ΔF/F)	(% ΔF/F)		fraction of control (%)
	13.9357	9.89287		70.9894
	19.3843	16.9212		87.2933
	9.212	8.31026		90.2112
n	3	3		3
mean	14.1773	11.7081	% ΔF/F	82.8313	%	17.1687	% reduction
sem	2.93897	2.64628	% ΔF/F	5.98058	%
Ratio paired t test
P value	0.1227
P value summary	ns
Significantly different (P < 0.05)?	No
One- or two-tailed P value?	Two-tailed
t, df	t=2.585, df=2
Number of pairs	3
3b	SNX482	a-EPSP evoked ΔF/F in AIS, control vs. SNX482, paired
peak ΔF/F OGB-1	control (% ΔF/F)	(% ΔF/F)		fraction of control (%)
	8.28	9.54		115.217
	6.35	6.3		99.2126
	6.66	7.54		113.213
n	3	3		3
mean	7.09667	7.79333	% ΔF/F	109.214	%	-9.2144	% reduction
sem	0.598396	0.943846	% ΔF/F	5.03426	%
Ratio paired t test
P value	0.1051
P value summary	ns
Significantly different (P < 0.05)?	No
One- or two-tailed P value?	One-tailed
t, df	t=1.821, df=2
Number of pairs	3
3b	ω-conotoxin MVIIC	a-EPSP evoked ΔF/F in AIS, control vs. ω-conotoxin MVIIC, paired
peak ΔF/F OGB-1	control (% ΔF/F)	(% ΔF/F)		fraction of control (%)
	7.50773	7.6782		102.271
	1.84693	2.40017		129.955
	3.31886	2.81411		84.7915
	14.8519	15.3283		103.208
	14.5389	11.3237		77.8855
n	5	5		5
mean	8.41286	7.9089	% ΔF/F	99.622	%	0.378033	% reduction
sem	3.13948	2.86354	% ΔF/F	10.4038	%
Ratio paired t test
P value	0.4174
P value summary	ns
Significantly different (P < 0.05)?	No
One- or two-tailed P value?	One-tailed
t, df	t=0.2225, df=4
Number of pairs	5
3b	NCX	a-EPSP evoked ΔF/F in AIS, control vs.NCX, paired
peak ΔF/F OGB-1	control (% ΔF/F)	(% ΔF/F)		fraction of control (%)
	17.97	17.39		96.7724
	6.61	14		211.8
	16	25		156.25
	13	18		138.462
	8.875	7.94		89.4648
n	5	5		5
mean	12.491	16.466	% ΔF/F	138.55	%	-38.5498	% reduction
sem	2.1243	2.78217	% ΔF/F	22.1739	%
Ratio paired t test
P value	0.1569
P value summary	ns
Significantly different (P < 0.05)?	No
One- or two-tailed P value?	Two-tailed
t, df	t=1.740, df=4
Number of pairs	5
AP
3b	EGTA	AP evoked ΔF/F in AIS, control vs. EGTA, paired
peak ΔF/F OGB-1	control (% ΔF/F)	EGTA (% ΔF/F)		fraction of control (%)
	73.208	3.017		4.12113
	102.358	10.721		10.474
	43.207	4.492		10.3965
	90.339	3.518		3.89422
n	4	4		4
mean	77.278	5.437	% ΔF/F	7.22146	%	92.7785	% reduction
sem	12.8355	1.78775	% ΔF/F	1.85612	%
Ratio paired t test
P value	0.0011
P value summary	**
Significantly different (P < 0.05)?	Yes
One- or two-tailed P value?	One-tailed
t, df	t=9.901, df=3
Number of pairs	4
3b	TTA-P2	AP evoked ΔF/F in AIS, control vs. TTA-P2, paired
peak ΔF/F OGB-1	control (% ΔF/F)	TTA-P2 (% ΔF/F)		fraction of control (%)
	53	36.05		68.0189
	28	25		89.2857
	37	29.55		79.8649
	62	54.5		87.9032
n	4	4		4
mean	45	36.275	% ΔF/F	81.2682	%	18.7318	% reduction
sem	7.67029	6.48429	% ΔF/F	4.88039	%
Ratio paired t test
P value	0.0211
P value summary	*
Significantly different (P < 0.05)?	Yes
One- or two-tailed P value?	One-tailed
t, df	t=3.411, df=3
Number of pairs	4
3b	nickel	AP evoked ΔF/F in AIS, control vs. nickel, paired
peak ΔF/F OGB-1	control (% ΔF/F)	nickel (% ΔF/F)		fraction of control (%)
	87.305	61.885		70.8837
	94.787	89.582		94.5087
	54.911	50.72		92.3676
	93.922	67.702		72.0832
	81.674	58.484		71.6066
n	5	5		5
mean	82.5198	65.6746	% ΔF/F	80.29	%	19.71	% reduction
sem	7.3019	6.57792	% ΔF/F	5.38179	%
Ratio paired t test
P value	0.0127
P value summary	*
Significantly different (P < 0.05)?	Yes
One- or two-tailed P value?	One-tailed
t, df	t=3.479, df=4
Number of pairs	5
3b	isradipine	AP evoked ΔF/F in AIS, control vs. Isradipine, paired
peak ΔF/F OGB-1	control (% ΔF/F)	isradipine (% ΔF/F)		fraction of control (%)
	25.05	20.61		82.2754
	24.1867	19.105		78.9898
	46.1	41.005		88.9479
	26.61	23.97		90.0789
n	4	4		4
mean	30.4867	26.1725	% ΔF/F	85.073	%	14.927	% reduction
sem	5.22854	5.04765	% ΔF/F	2.65998	%
Ratio paired t test
P value	0.007
P value summary	**
Significantly different (P < 0.05)?	Yes
One- or two-tailed P value?	One-tailed
t, df	t=5.188, df=3
Number of pairs	4
3b	nimodipine	AP evoked ΔF/F in AIS, control vs. nimodipine, paired
peak ΔF/F OGB-1	control (% ΔF/F)	(% ΔF/F)		fraction of control (%)
	19	11.14		58.6316
	29.7609	27.0056		90.7422
	34.16	29.98		87.7635
	25.74	22.5		87.4126
n	4	4		4
mean	27.1652	22.6564	% ΔF/F	81.1375	%	18.8625	% reduction
sem	3.21929	4.13525	% ΔF/F	7.53905	%
Ratio paired t test
P value	0.0597
P value summary	ns
Significantly different (P < 0.05)?	No
One- or two-tailed P value?	One-tailed
t, df	t=2.162, df=3
Number of pairs	4
3b	TTA-P2 + isradipine	AP evoked ΔF/F in AIS, control vs. TTA-P2 + isradipine, paired
peak ΔF/F OGB-1	control (% ΔF/F)	(% ΔF/F)		fraction of control (%)
	71.3647	55.5076		77.7802
	30.9998	23.0016		74.1992
	55.1834	31.3458		56.803
	46.3639	41.8886		90.3474
	77.1597	49.9215		64.6989
n	5	5		5
mean	56.2143	40.333	% ΔF/F	72.7657	%	27.2343	% reduction
sem	8.3729	5.94043	% ΔF/F	5.728	%
Ratio paired t test
P value	0.0071
P value summary	**
Significantly different (P < 0.05)?	Yes
One- or two-tailed P value?	One-tailed
t, df	t=4.163, df=4
Number of pairs	5
3b	SNX482	AP evoked ΔF/F in AIS, control vs. SNX482, paired
peak ΔF/F OGB-1	control (% ΔF/F)	(% ΔF/F)		fraction of control (%)
	31.18	26.45		84.83
	33.76	34.44		102.014
	30.45	31.23		102.562
n	3	3		3
mean	31.7967	30.7067	% ΔF/F	96.4686	%	3.5314	% reduction
sem	1.00403	2.32131	% ΔF/F	5.82144	%
Ratio paired t test
P value	0.2946
P value summary	ns
Significantly different (P < 0.05)?	No
One- or two-tailed P value?	One-tailed
t, df	t=0.6372, df=2
Number of pairs	3
3b	ω-conotoxin MVIIC	AP evoked ΔF/F in AIS, control vs. ω-conotoxin MVIIC, paired
peak ΔF/F OGB-1	control (% ΔF/F)	(% ΔF/F)		fraction of control (%)
	27.1239	26.3169		97.0248
	19.6778	20.4265		103.805
	56.0294	52.989		94.5736
	54.5546	46.9627		86.0838
	43.9731	37.1235		84.4232
n	5	5		5
mean	40.2718	36.7637	% ΔF/F	93.182	%	6.81796	% reduction
sem	7.29034	6.09692	% ΔF/F	3.58223	%
Ratio paired t test
P value	0.0639
P value summary	ns
Significantly different (P < 0.05)?	No
One- or two-tailed P value?	One-tailed
t, df	t=1.916, df=4
Number of pairs	5
3b	ω-conotoxin MVIIC	AP evoked ΔF/F in bouton, control vs. ω-conotoxin MVIIC, paired
peak ΔF/F OGB-1	control (% ΔF/F)	(% ΔF/F)		fraction of control (%)
	21.7338	0.732161		3.36877
	7.08285	1.37649		19.4341
	10.6948	0.315494		2.94998
n	3	3		3
mean	13.1705	0.808048	% ΔF/F	8.58429	%	91.4157	% reduction
sem	4.40679	0.308625	% ΔF/F	5.42627	%
Ratio paired t test
P value	0.0213
P value summary	*
Significantly different (P < 0.05)?	Yes
One- or two-tailed P value?	One-tailed
t, df	t=4.693, df=2
Number of pairs	3
3b	NCX	AP evoked ΔF/F in AIS, control vs.NCX, paired
peak ΔF/F OGB-1	control (% ΔF/F)	(% ΔF/F)		fraction of control (%)
	52.32	46.076		88.0657
	23.7	42		177.215
	48	50		104.167
	39	77		197.436
	16.26	22.04		135.547
n	5	5		5
mean	35.856	47.4232	% ΔF/F	140.486	%	-40.4862	% reduction
sem	6.92891	8.82315	% ΔF/F	20.8371	%
Ratio paired t test
P value	0.127
P value summary	ns
Significantly different (P < 0.05)?	No
One- or two-tailed P value?	Two-tailed
t, df	t=1.922, df=4
Number of pairs	5
