# Supplementary material for: Ca2+ entry through NaV channels generates submillisecond axonal Ca2+ signaling
Source: eLife journal article supplement (doi:10.7554/elife.54566), 2020-06-17
Supplement: supp [file elife-54566-supp-v1.zip › elife_poa_e54566_Figure_4_source_data_1.xlsx]

## Sheet: Sheet1
	Figure 4-source data 1. NaV channels mediate subthreshold [Ca2+]i changes in the AIS
4c	subthreshold voltage ramp evoked ΔF/F in AIS
peak ΔF/F OGB-5N	peak voltage (mV)	control (% ΔF/F)				mean	sem
	-78.45	0.248333	-0.0416667	0.118333	-0.0216667	0.0758333	0.0676233
	-75.9	0.182333	-0.0416667	0.0683333	-0.0516667	0.0393333	0.0548726
	-73.275	0.328333	0.128333	0.228333	0.688333	0.343333	0.122031
	-70.675	0.378333	0.518333	0.498333	0.688333	0.520833	0.0638194
	-68.1	0.478333	0.918333	0.818333	1.25833	0.868333	0.16052
	-65.525	0.408333	0.988333	0.948333	1.46833	0.953333	0.216699
	-62.3	0.978333	1.39833	1.17833	2.70833	1.56583	0.390371
	-59.7	1.20833	1.90833	1.55833	3.55833	2.05833	0.520016
	-57.1	1.66833	2.95833	2.32833	5.13833	3.02333	0.752579
	-54.475	2.20833	3.68833	3.47833	6.92833	4.07583	1.00546
	-51.3	6.02	17.22	10.13	12.54	11.4775	2.33997	AP
	peak voltage (mV)	TTX (% ΔF/F)				mean	sem	fraction of control (%)	block (%)	Cohen's d
	-78.45	0.0183333	0.0483333	0.208333	-0.631667	-0.0891667	0.185579	-117.582	217.582
	-75.9	0.328333	0.0583333	-0.0916667	-0.291667	0.000833333	0.1306	2.11864	97.8814
	-73.275	0.0783333	0.0983333	-0.301667	1.37833	0.313333	0.366731	91.2621	8.73786
	-70.675	-0.0816667	0.298333	0.418333	0.808333	0.360833	0.18332	69.28	30.72
	-68.1	0.118333	0.238333	0.0183333	0.378333	0.188333	0.0776745	21.6891	78.3109
	-65.525	0.181333	0.108333	0.308333	0.588333	0.296583	0.105663	31.1101	68.8899
	-62.3	0.0183333	0.318333	-0.0616667	-0.261667	0.00333333	0.120381	0.212879	99.7871
	-59.7	0.0783333	0.248333	-0.411667	-0.331667	-0.104167	0.159132	-5.06073	105.061
	-57.1	0.248333	0.288333	0.418333	0.558333	0.378333	0.0701189	12.5138	87.4862
	-54.475	0.288333	0.158333	0.418333	0.308333	0.293333	0.0533073	7.19689	92.8031	1.88097
	-51.3	0.0583333	0.128333	0.138333	0.848333	0.293333	0.185854
	-48.675	0.208333	0.428333	0.158333	0.718333	0.378333	0.127606
	-44.825	0.00833333	1.06833	0.358333	0.958333	0.598333	0.251031
	-42.25	0.208333	0.598333	0.268333	1.17833	0.563333	0.222205
	-39.65	0.198333	0.858333	0.608333	0.608333	0.568333	0.136687
	-37.025	0.588333	1.40833	0.218333	1.70833	0.980833	0.347308
	peak voltage (mV)	QX-324 (% ΔF/F)				mean	sem	fraction of control (%)	block (%)
	-78.45	0.0683333	0.128333	0.0583333	-0.201667	0.0133333	0.0733144	17.5824	82.4176
	-75.9	0.458333	-0.0116667	0.00833333	0.108333	0.140833	0.109039	358.051	-258.051
	-73.275	0.0183333	-0.0616667	0.0183333	0.0383333	0.00333333	0.0221736	0.970874	99.0291
	-70.675	0.358333	0.0883333	0.0483333	0.188333	0.170833	0.0690863	32.8	67.2
	-68.1	0.268333	-0.0916667	0.218333	0.128333	0.130833	0.0796215	15.0672	84.9328
	-65.525	0.0983333	0.178333	0.338333	-0.0616667	0.138333	0.0832666	14.5105	85.4895
	-62.3	0.0983333	0.308333	-0.00166667	0.0583333	0.115833	0.0673764	7.39755	92.6024
	-59.7	0.308333	0.168333	-0.00166667	0.0883333	0.140833	0.0657489	6.84211	93.1579
	-57.1	0.0483333	0.308333	0.0683333	0.408333	0.208333	0.0890693	6.89085	93.1092
	-54.475	0.188333	0.318333	0.188333	0.148333	0.210833	0.0370529	5.17277	94.8272	1.922
	-51.3	0.278333	0.278333	0.638333	0.378333	0.393333	0.085
	-48.675	0.0783333	0.338333	0.238333	0.578333	0.308333	0.104722
	-44.825	0.00833333	0.398333	0.488333	0.488333	0.345833	0.114483
	-42.25	0.518333	0.438333	0.858333	1.05833	0.718333	0.145373
	-39.65	0.508333	0.398333	1.10833	0.928333	0.735833	0.16869
	-37.025	0.498333	0.478333	0.908333	0.958333	0.710833	0.12893
Two-way ANOVA	Ordinary
Alpha	0.05
Source of Variation	% of total variation	P value	P value summary	Significant?
Interaction	30.38	<0.0001	****	Yes
voltage	18.97	<0.0001	****	Yes
condition	28.9	<0.0001	****	Yes
ANOVA table	SS	DF	MS	F (DFn, DFd)	P value
Interaction	40.84	18	2.269	F (18, 90) = 6.980	P<0.0001
voltage	25.5	9	2.833	F (9, 90) = 8.717	P<0.0001
condition	38.86	2	19.43	F (2, 90) = 59.77	P<0.0001
Residual	29.25	90	0.325
Tukey's multiple comparisons test	Mean Diff.	95.00% CI of diff.	Significant?	Summary	Adjusted P Value
-78.5
ctrl vs. ttx	0.165	-0.7957 to 1.126	No	ns	0.9119
ctrl vs. qx	0.0625	-0.8982 to 1.023	No	ns	0.9868
ttx vs. qx	-0.1025	-1.063 to 0.8582	No	ns	0.965
-75.9
ctrl vs. ttx	0.0385	-0.9222 to 0.9992	No	ns	0.995
ctrl vs. qx	-0.1015	-1.062 to 0.8592	No	ns	0.9657
ttx vs. qx	-0.14	-1.101 to 0.8207	No	ns	0.9357
-73.3
ctrl vs. ttx	0.03	-0.9307 to 0.9907	No	ns	0.997
ctrl vs. qx	0.34	-0.6207 to 1.301	No	ns	0.6771
ttx vs. qx	0.31	-0.6507 to 1.271	No	ns	0.7229
-70.7
ctrl vs. ttx	0.16	-0.8007 to 1.121	No	ns	0.9169
ctrl vs. qx	0.35	-0.6107 to 1.311	No	ns	0.6617
ttx vs. qx	0.19	-0.7707 to 1.151	No	ns	0.8849
-68.1
ctrl vs. ttx	0.68	-0.2807 to 1.641	No	ns	0.2158
ctrl vs. qx	0.7375	-0.2232 to 1.698	No	ns	0.1659
ttx vs. qx	0.0575	-0.9032 to 1.018	No	ns	0.9888
-65.5
ctrl vs. ttx	0.6568	-0.3040 to 1.617	No	ns	0.2387
ctrl vs. qx	0.815	-0.1457 to 1.776	No	ns	0.1129
ttx vs. qx	0.1583	-0.8025 to 1.119	No	ns	0.9187
-62.3
ctrl vs. ttx	1.563	0.6018 to 2.523	Yes	***	0.0006
ctrl vs. qx	1.45	0.4893 to 2.411	Yes	**	0.0015
ttx vs. qx	-0.1125	-1.073 to 0.8482	No	ns	0.958
-59.7
ctrl vs. ttx	2.163	1.202 to 3.123	Yes	****	<0.0001
ctrl vs. qx	1.918	0.9568 to 2.878	Yes	****	<0.0001
ttx vs. qx	-0.245	-1.206 to 0.7157	No	ns	0.8163
-57.1
ctrl vs. ttx	2.645	1.684 to 3.606	Yes	****	<0.0001
ctrl vs. qx	2.815	1.854 to 3.776	Yes	****	<0.0001
ttx vs. qx	0.17	-0.7907 to 1.131	No	ns	0.9067
-54.5
ctrl vs. ttx	3.783	2.822 to 4.743	Yes	****	<0.0001
ctrl vs. qx	3.865	2.904 to 4.826	Yes	****	<0.0001
ttx vs. qx	0.0825	-0.8782 to 1.043	No	ns	0.9772
