# Supplementary material for: Ca2+ entry through NaV channels generates submillisecond axonal Ca2+ signaling
Source: eLife journal article supplement (doi:10.7554/elife.54566), 2020-06-17
Supplement: supp [file elife-54566-supp-v1.zip › elife_poa_e54566_Figure_5_figure_supplement_1.pdf]

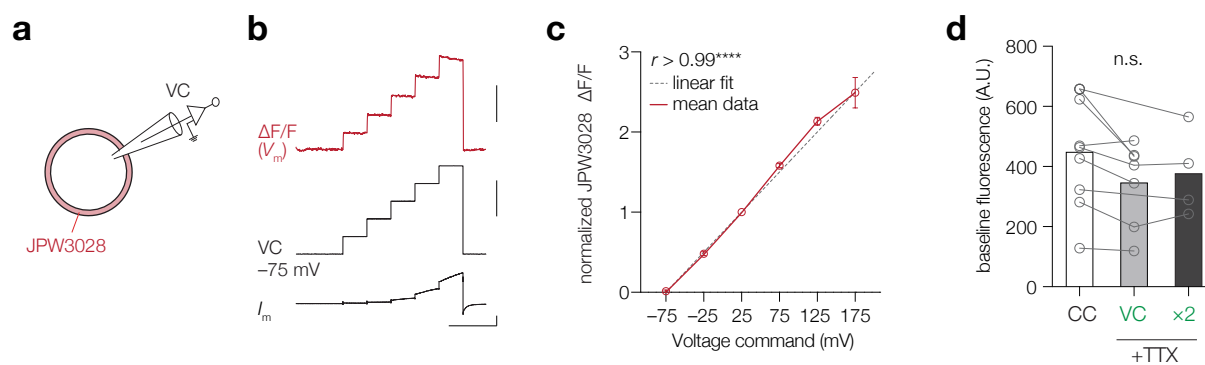

**Figure 5—figure supplement 1.** JPW3028 fluorescence linearly increases with membrane potential over a wide range of voltages
