# Supplementary material for: Ca2+ entry through NaV channels generates submillisecond axonal Ca2+ signaling
Source: eLife journal article supplement (doi:10.7554/elife.54566), 2020-06-17
Supplement: supp [file elife-54566-supp-v1.zip › elife_poa_e54566_Figure_5_source_data_1.xlsx]

## Sheet: Sheet1
	Figure 5-source data 1. NaV channels mediate AP-evoked [Ca2+]i changes at the AIS
5b	AP-evoked ΔF/F OGB-5N peak in AIS
peak ΔF/F OGB-5N	control (% ΔF/F)	ttx VC (% ΔF/F)	ttx VCx2 (% ΔF/F)
	8.654	1.247	3.152
	8.094	0.764	2.591
	9.185	2.112	3.759
	11.878		5.243
	10.243	1.208	3.754
	10.106	0.488	3.99
	9.369	0.471	1.983
	10.022	0.819	2.318
n	8	7	8
mean	9.69388	1.01557	3.34875	(% ΔF/F)
sem	0.408719	0.216551	0.374941	(% ΔF/F)
fraction of control		10.4764	34.545	%
block		89.5236	65.455	%
Cohen's d		7.50697	5.4887
ANOVA summary
F	160.8
P value	<0.0001
P value summary	****
Significant diff. among means (P < 0.05)?	Yes
R square	0.9414
ANOVA table	SS	DF	MS	F (DFn, DFd)	P value
Treatment (between columns)	0.03087	2	0.01543	F (2, 20) = 160.8	P<0.0001
Residual (within columns)	0.00192	20	9.598e-05
Total	0.03279	22
Tukey's multiple comparisons test	Mean Diff.	95.00% CI of diff.	Significant?	Summary	Adjusted P Value
control vs. ttx VC	0.08678	0.07395 to 0.09961	Yes	****	<0.0001	A-B
control vs. ttx VCx2	0.06345	0.05106 to 0.07584	Yes	****	<0.0001	A-C
ttx VC vs. ttx VCx2	-0.02333	-0.03616 to -0.01050	Yes	***	0.0005	B-C
Test details	Mean 1	Mean 2	Mean Diff.	SE of diff.	n1	n2	q	DF
control vs. ttx VC	0.09694	0.01016	0.08678	0.005071	8	7	24.2	20
control vs. ttx VCx2	0.09694	0.03349	0.06345	0.004899	8	8	18.32	20
ttx VC vs. ttx VCx2	0.01016	0.03349	-0.02333	0.005071	7	8	6.507	20
5c	AP-evoked ΔF/F JPW peak in AIS
peak ΔF/F JPW	control (% ΔF/F)	ttx VC (% ΔF/F)	ttx VCx2 (% ΔF/F)
	5.99958	3.19532
	3.02568	2.17491
	3.29959	1.38223
	3.29	1.80594
	2.7279	1.48668
	3.90344	2.20135	3.3892
	4.80409	2.13577	4.04407
	2.1352		2.37018
	2.86428		2.77593
n	9	7	4
mean	3.56108	2.0546	3.14485	(% ΔF/F)
sem	0.395284	0.227841	0.365664	(% ΔF/F)
fraction of control		57.6959	88.3114	%
Cohen's d		1.27038	0.351005
ANOVA summary
F	5.159
P value	0.0177
P value summary	*
Significant diff. among means (P < 0.05)?	Yes
R square	0.3777
ANOVA table	SS	DF	MS	F (DFn, DFd)	P value
Treatment (between columns)	0.0009125	2	0.0004562	F (2, 17) = 5.159	P=0.0177
Residual (within columns)	0.001503	17	8.844e-05
Total	0.002416	19
Tukey's multiple comparisons test	Mean Diff.	95.00% CI of diff.	Significant?	Summary	Adjusted P Value
control vs. ttx VC	0.01506	0.002907 to 0.02722	Yes	*	0.0144	A-B
control vs. ttx VCx2	0.004162	-0.01034 to 0.01866	No	ns	0.7456	A-C
ttx VC vs. ttx VCx2	-0.0109	-0.02602 to 0.004219	No	ns	0.1838	B-C
Test details	Mean 1	Mean 2	Mean Diff.	SE of diff.	n1	n2	q	DF
control vs. ttx VC	0.03561	0.02055	0.01506	0.004739	9	7	4.495	17
control vs. ttx VCx2	0.03561	0.03145	0.004162	0.005651	9	4	1.042	17
ttx VC vs. ttx VCx2	0.02055	0.03145	-0.0109	0.005894	7	4	2.616	17
5 - supplement 1b	JPW3028 ΔF/F in response to voltage steps (first 20 frames per step)
peak ΔF/F OGB-5N	Voltage step	cell 1	cell 2	cell 3
	0	0.011895	-0.00035	0.001694
	50	0.150931	0.296063	0.430391
	100	0.286837	0.667171	0.904051
	150	0.46825	1.03703	1.40743
	200	0.637428	1.3701	1.92441
	250		1.535	2.42438
Pearson r
r		0.998	0.9952	0.9995
95% confidence interval		0.9690 to 0.9999	0.9544 to 0.9995	0.9953 to 0.9999
R squared		0.9961	0.9903	0.999
P value
P (two-tailed)		0.0001	<0.0001	<0.0001
P value summary		***	****	****
Significant? (alpha = 0.05)		Yes	Yes	Yes
Number of XY Pairs		5	6	6
5 - supplement 1b	JPW3028 ΔF/F in response to voltage steps normalized to first step
peak ΔF/F OGB-5N	Voltage step	cell 1	cell 2	cell 3	mean
	0	0.04147	-0.000525	0.001874	0.014273
	50	0.526191	0.443759	0.476069	0.482006
	100	1	1	1	1
	150	1.63246	1.55437	1.5568	1.58121
	200	2.22227	2.0536	2.12865	2.13484
	250		2.30076	2.68168	2.49122
Pearson r
r					0.9994
95% confidence interval					0.9946 to 0.9999
R squared					0.9989
P value
P (two-tailed)					<0.0001
P value summary					****
Significant? (alpha = 0.05)					Yes
Number of XY Pairs					6
5 - supplement 1b	baseline fluorescence JPW during the recordings presented in Figure 5a and c
baseline fluorescence JPW	control (A.U.)	ttx VC (A.U.)	ttx VCx2 (A.U.)
	427.229	344.663
	623.481	437.546
	468.993	486.14
	657.624	433.618
	128.593	118.844
	281.969	198.763	242.218
	463.787	404.186	410.266
	658.388		565.169
	322.845		289.128
n	9	7	4
mean	448.101	346.251	376.695
sem	60.71	51.7232	72.1119
Cohen's d		0.559213	0.392059
ANOVA summary
F	0.8334
P value	0.4516
P value summary	ns
Significant diff. among means (P < 0.05)?	No
R square	0.08929
ANOVA table	SS	DF	MS	F (DFn, DFd)	P value
Treatment (between columns)	43151	2	21576	F (2, 17) = 0.8334	P=0.4516
Residual (within columns)	440135	17	25890
Total	483286	19
Tukey's multiple comparisons test	Mean Diff.	95.00% CI of diff.	Significant?	Summary	Adjusted P Value
control vs. ttx VC	101.8	-106.2 to 309.9	No	ns	0.438	A-B
control vs. ttx VCx2	71.41	-176.6 to 319.5	No	ns	0.7444	A-C
ttx VC vs. ttx VCx2	-30.44	-289.2 to 228.3	No	ns	0.9512	B-C
Test details	Mean 1	Mean 2	Mean Diff.	SE of diff.	n1	n2	q	DF
control vs. ttx VC	448.1	346.3	101.8	81.09	9	7	1.776	17
control vs. ttx VCx2	448.1	376.7	71.41	96.69	9	4	1.044	17
ttx VC vs. ttx VCx2	346.3	376.7	-30.44	100.9	7	4	0.4269	17
