# Supplementary material for: Ca2+ entry through NaV channels generates submillisecond axonal Ca2+ signaling
Source: eLife journal article supplement (doi:10.7554/elife.54566), 2020-06-17
Supplement: supp [file elife-54566-supp-v1.zip › elife_poa_e54566_Figure_6_source_data_1.xlsx]

## Sheet: Sheet1
	Figure 6-source data 1. Temporal derivative of AIS [Ca2+]i mirrors the gating kinetics of NaV channels
	Activation time of inward current (exponential fit)
	Control (ms)	Nickel sens (ms)	TTX-sensitive (ms)
	0.51	5.12
	0.72	2.94
	0.15	6.47
	0.43	3.56
	0.37	5.7
	0.881068		0.882638
	0.431406		0.431439
	0.319817		0.320006
	0.152843		0.153021
	0.281874		0.281467
	0.573606		0.572987
n	11	5	6
mean	0.438238	4.758	0.44026
sem	0.0678728	0.659154	0.105763
ANOVA summary
F	71.83
P value	<0.0001
P value summary	****
Significant diff. among means (P < 0.05)?	Yes
R square	0.8832
ANOVA table	SS	DF	MS	F (DFn, DFd)	P value
Treatment (between columns)	72.07	2	36.04	F (2, 19) = 71.83	P<0.0001
Residual (within columns)	9.532	19	0.5017
Total	81.6	21
Tukey's multiple comparisons test	Mean Diff.	95.00% CI of diff.	Significant?	Summary	Adjusted P Value
cntrl vs. Ni sens	-4.32	-5.290 to -3.349	Yes	****	<0.0001	A-B
cntrl vs. ttx sen	-0.002022	-0.9152 to 0.9112	No	ns	>0.9999	A-C
Ni sens vs. ttx sen	4.318	3.228 to 5.407	Yes	****	<0.0001	B-C
Test details	Mean 1	Mean 2	Mean Diff.	SE of diff.	n1	n2	q	DF
cntrl vs. Ni sens	0.4382	4.758	-4.32	0.382	11	5	15.99	19
cntrl vs. ttx sen	0.4382	0.4403	-0.002022	0.3595	11	6	0.007955	19
Ni sens vs. ttx sen	4.758	0.4403	4.318	0.4289	5	6	14.24	19
6d	Boltzmann sigmoid slope of INa, ICa_opt and ICa
	INa (ms)	ICa_opt (ms)	ICaT (ms)
	0.19056		2.3479
	0.19952		2.3851
	0.19212		2.5118
	0.24064		2.5582
	0.20255		2.4978
	0.23874	0.66777
	0.21744	0.76996
	0.24144	1.1716
	0.20273	0.43775
	0.20166	0.44597
	0.20759	0.38206
	0.20443	0.3305
	0.23079	0.46128
	0.19402	0.72593
	0.14278	0.26003
	0.15779	0.28615
	0.2451	0.48971
n	17	12	5
mean	0.206465	0.535726	2.46016
sem	0.00685521	0.0749827	0.0399572
ANOVA summary
F	391.7
P value	<0.0001
P value summary	****
Significant diff. among means (P < 0.05)?	Yes
R square	0.9619
ANOVA table	SS	DF	MS	F (DFn, DFd)	P value
Treatment (between columns)	19.88	2	9.942	F (2, 31) = 391.7	P<0.0001
Residual (within columns)	0.7869	31	0.02538
Total	20.67	33
Tukey's multiple comparisons test	Mean Diff.	95.00% CI of diff.	Significant?	Summary	Adjusted P Value
INa vs. ICa_opt	-0.3293	-0.4771 to -0.1814	Yes	****	<0.0001	A-B
INa vs. ICaT	-2.254	-2.453 to -2.054	Yes	****	<0.0001	A-C
ICa_opt vs. ICaT	-1.924	-2.133 to -1.716	Yes	****	<0.0001	B-C
Test details	Mean 1	Mean 2	Mean Diff.	SE of diff.	n1	n2	q	DF
INa vs. ICa_opt	0.2065	0.5357	-0.3293	0.06007	17	12	7.752	31
INa vs. ICaT	0.2065	2.46	-2.254	0.08105	17	5	39.32	31
ICa_opt vs. ICaT	0.5357	2.46	-1.924	0.0848	12	5	32.09	31
6 - figure supplement 1 c	Slope
	SBFI	OGB-5N
	0.327	0.319
	0.252	0.333
	0.597	0.585
	0.29	0.297
n	4	4
mean	0.3665	0.3835
sem	0.0783438	0.067574
Wilcoxon matched-pairs signed rank test
P value	>0.9999
Exact or approximate P value?	Exact
P value summary	ns
Significantly different (P < 0.05)?	No
One- or two-tailed P value?	Two-tailed
Sum of positive, negative ranks	5.000 , -5.000
Sum of signed ranks (W)	0
Number of pairs	4
Number of ties (ignored)	0
6 - figure supplement 1 c	Ratio subthreshold to peak
	SBFI	OGB-5N
	0.273	0.189
	0.251	0.286
	0.265	0.334
	0.312	0.323
n	4	4
mean	0.27525	0.283
sem	0.0130663	0.0329722
Paired t test
P value	0.8285
P value summary	ns
Significantly different (P < 0.05)?	No
One- or two-tailed P value?	Two-tailed
t, df	t=0.2362, df=3
Number of pairs	4
