# Supplementary material for: Ca2+ entry through NaV channels generates submillisecond axonal Ca2+ signaling
Source: eLife journal article supplement (doi:10.7554/elife.54566), 2020-06-17
Supplement: supp [file elife-54566-supp-v1.zip › elife_poa_e54566_Figure_7_source_data_1.xlsx]

## Sheet: Sheet1
	Figure 7-source data 1. HEK-293 cell expressing Nav1.2 show coltage dependent Ca2+ influx
7b	Peak amplitude INa
	I (pA)	pA/pF
	-414.279	-63.7352
	-756.501	-54.8189
	-550.899	-54.5445
	-106.348	-17.7247
	-487.528	-58.039
	-951.893	-113.321
	-2933.94	-206.615
	-1114.66	-91.3656
	-1487.49	-195.722
	-1564.33	-300.833
n	10	10
mean	-1036.79	-115.672
sem	257.412	28.4042
7b	Peak amplitude INa in control and after TTX block
	Control (pA)	TTX (pA)	Block in %
	-2265.9	-40.3	98.2215
	-221.632	-17.7441	91.9939
	-438.302	-41.0716	90.6294
	-2855.3	-50.7	98.2244
	-96.2895	1.22587	101.273
	-468.363	-12.8892	97.248
	-538.778	-26.2163	95.1341
n	7	7	7
mean	-983.509	-26.8136	96.1035
sem	416.223	6.93241	1.31563
Wilcoxon matched-pairs signed rank test
P value	0.0078
Exact or approximate P value?	Exact
P value summary	**
Significantly different (P < 0.05)?	Yes
One- or two-tailed P value?	One-tailed
Sum of positive, negative ranks	28.00 , 0.000
Sum of signed ranks (W)	28
Number of pairs	7
Number of ties (ignored)	0
7c	Activation
	Half-activation (mV) (x0)	Slope (k) (dx)
	-26.8732	8.27162
	-15.2273	9.49564
	-32.2275	7.47444
	-22.514	8.3214
	-13.5421	8.71373
	-37.2148	7.7099
	-26.0289	5.99323
	-26.5278	6.53063
	-24.7965	5.52103
	-29.4898	6.10252
n	10	10
mean	-25.4442	7.41341
sem	2.25963	0.41866
7e	Inactivation
	Half-inactivation (mV) (x0)	Slope (k) (dx)
	-90.1303	6.90441
	-71.6522	10.11
	-71.9788	9.87495
	-83.6975	18.3486
	-63.836	15.583
	-92.6988	8.98566
	-74.8594	10.0259
	-80.8165	8.47243
	-52.3973	16.8568
	-59.0433	7.79238
n	10	10
mean	-74.111	11.2954
sem	4.15564	1.28647
7h	peak OGB-1 ΔF/F in control and after TTX application	dFF (%)
	Control (% ΔF/F)	TTX (% ΔF/F)	Fraction of cntrl (%)
	0.0611039	not recorded
	0.667263	not recorded
	0.130828	0.0225386	17.2277
	0.625842	0.020834	3.32896
	1.3579	0.144598	10.6486
	0.169779	not recorded
	0.181546	0.000389516	0.214555
n	7	4	4
mean	0.456323	0.04709	7.85495
sem	0.176327	0.0328898	3.81349
Mann Whitney test
P value	0.0121
Exact or approximate P value?	Exact
P value summary	*
Significantly different (P < 0.05)?	Yes
One- or two-tailed P value?	One-tailed
Sum of ranks in column A,B	54 , 12
Mann-Whitney U	2
