# Supplementary material for: Ca2+ entry through NaV channels generates submillisecond axonal Ca2+ signaling
Source: eLife journal article supplement (doi:10.7554/elife.54566), 2020-06-17
Supplement: supp [file elife-54566-supp-v1.zip › elife_poa_e54566_Table_1_source_data_1.xlsx]

## Sheet: Sheet1
	Table 1-source data 1. Effect of Ca2+ entry on AP waveform
Table 1	Resting membrane potential before and after TTA-P2 + isradipine bath application
RMP	Control (mV)	TTA-P2 + isradipine (mV)
	-78.16	-77.65
	-78.05	-71.77
	-85.03	-85.65
	-76.64	-76.23
	-69.31	-68.88
n	5	5
mean	-77.438	-76.036
sem	2.50235	2.86774
Paired t test
P value	0.3204
P value summary	ns
Significantly different (P < 0.05)?	No
One- or two-tailed P value?	Two-tailed
t, df	t=1.133, df=4
Number of pairs	5
Table 1	AP threshold before and after TTA-P2 + isradipine bath application
AP threshold	Control (mV)	TTA-P2 + isradipine (mV)
	-60.7	-58.61
	-65.08	-56.31
	-77.89	-79.13
	-68.34	-68.77
	-63.36	-62.1
n	5	5
mean	-67.074	-64.984
sem	2.97478	4.11477
Paired t test
P value	0.3034
P value summary	ns
Significantly different (P < 0.05)?	No
One- or two-tailed P value?	Two-tailed
t, df	t=1.180, df=4
Number of pairs	5
Table 1	AP amplitude before and after TTA-P2 + isradipine bath application relative to RMP
AP amplitude	Control (mV)	TTA-P2 + isradipine (mV)
	102.2	99.42
	111.34	104.92
	109.43	109.99
	115.97	117.93
	115.38	114.11
n	5	5
mean	110.864	109.274
sem	2.4881	3.27784
Paired t test
P value	0.3345
P value summary	ns
Significantly different (P < 0.05)?	No
One- or two-tailed P value?	Two-tailed
t, df	t=1.096, df=4
Number of pairs	5
Table 1	AP width before and after TTA-P2 + isradipine bath application
AP width	Control (μs)	TTA-P2 + isradipine (μs)
	576.3	540.5
	615.3	782.6
	565	579.3
	602	547.6
	705	722.5
n	5	5
mean	612.72	634.5
sem	24.7394	49.5541
Paired t test
P value	0.606
P value summary	ns
Significantly different (P < 0.05)?	No
One- or two-tailed P value?	Two-tailed
t, df	t=0.5589, df=4
Number of pairs	5
Table 1	After hyperpolarization before and after TTA-P2 + isradipine bath application relative to RMP
AHP	Control (mV)	TTA-P2 + isradipine (mV)
	-1.31	-5.62
	4.3	-0.21
	6.04	5.12
	11.18	11.24
	7.94	5.5
n	5	5
mean	5.63	3.206
sem	2.07653	2.85516
Paired t test
P value	0.0551
P value summary	ns
Significantly different (P < 0.05)?	No
One- or two-tailed P value?	Two-tailed
t, df	t=2.682, df=4
Number of pairs	5
Table 1	After deperpolarization before and after TTA-P2 + isradipine bath application relative to RMP
ADP	Control (mV)	TTA-P2 + isradipine (mV)
	-0.37	-5.5
	5.25	0.03
	7.71	5.93
	13.39	13.36
	11.88	8.98
n	5	5
mean	7.572	4.56
sem	2.4586	3.32098
Paired t test
P value	0.0388
P value summary	*
Significantly different (P < 0.05)?	Yes
One- or two-tailed P value?	Two-tailed
t, df	t=3.028, df=4
Number of pairs	5
Table 1	Resting membrane potential before and after EGTA bath application
RMP	Control (mV)	EGTA (mV)
	-69.89	-77.56
	-66.41	-62.33
	-71.32	-77.06
	-74.15	-70.25
n	4	4
mean	-70.4425	-71.8
sem	1.6094	3.56988
Paired t test
P value	0.6922
P value summary	ns
Significantly different (P < 0.05)?	No
One- or two-tailed P value?	Two-tailed
t, df	t=0.4361, df=3
Number of pairs	4
Table 1	AP threshold before and after EGTA bath application
AP threshold	Control (mV)	EGTA (mV)
	-60.28	-70.53
	-48.08	-62.26
	-62.56	-63.5
	-66.16	-65.22
n	4	4
mean	-59.27	-65.3775
sem	3.92144	1.82156
Paired t test
P value	0.1917
P value summary	ns
Significantly different (P < 0.05)?	No
One- or two-tailed P value?	Two-tailed
t, df	t=1.679, df=3
Number of pairs	4
Table 1	AP amplitude before and after EGTA bath application relative to RMP
AP amplitude	Control (mV)	EGTA (mV)
	107.23	109.28
	103.01	105.37
	99.97	98.85
	99.42	100.38
n	4	4
mean	102.408	103.47
sem	1.79086	2.385
Paired t test
P value	0.2698
P value summary	ns
Significantly different (P < 0.05)?	No
One- or two-tailed P value?	Two-tailed
t, df	t=1.350, df=3
Number of pairs	4
Table 1	AP width before and after EGTA bath application
AP width	Control (ms)	EGTA (ms)
	726.22	1109.69
	648.03	1079.27
	773.36	933.44
	867.65	1003.6
n	4	4
mean	753.815	1031.5
sem	45.9097	39.5704
Paired t test
P value	0.035
P value summary	*
Significantly different (P < 0.05)?	Yes
One- or two-tailed P value?	Two-tailed
t, df	t=3.670, df=3
Number of pairs	4
Table 1	Afterhyperpolarization before and after EGTA bath application relative to RMP
AHP	Control (mV)	EGTA (mV at the same moment that AHP occured in control)
	2.65	37.02
	-6.48	25.01
	11.3	23.76
	7.3	16.3
n	4	4
mean	3.6925	25.5225
sem	3.82377	4.28774
Paired t test
P value	0.0434
P value summary	*
Significantly different (P < 0.05)?	Yes
One- or two-tailed P value?	Two-tailed
t, df	t=3.372, df=3
Number of pairs	4
Table 1	After deperpolarization before and after EGTA bath application relative to RMP
ADP	Control (mV)	EGTA (mV at the same moment that ADP occured in control)
	8.14	10.41
	-3.4	10.45
	12.18	16.32
	8.88	9.66
n	4	4
mean	6.45	11.71
sem	3.39873	1.54737
Paired t test
P value	0.172
P value summary	ns
Significantly different (P < 0.05)?	No
One- or two-tailed P value?	Two-tailed
t, df	t=1.786, df=3
Number of pairs	4
