# Supplementary figures and images for: Ca2+ entry through NaV channels generates submillisecond axonal Ca2+ signaling
Source: eLife journal article supplement (doi:10.7554/elife.54566), 2020-06-17

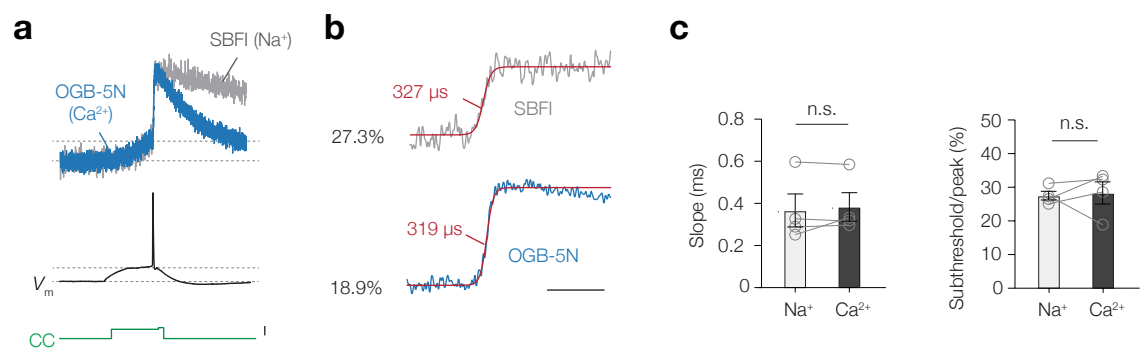

**Figure 6-figure supplement 1. AP-evoked  $\text{Ca}^{2+}$  and  $\text{Na}^+$  entry follow identical kinetics**

Supplement: supp [file elife-54566-supp-v1.zip › elife_poa_e54566_Figure_6_figure_supplement_1.pdf]

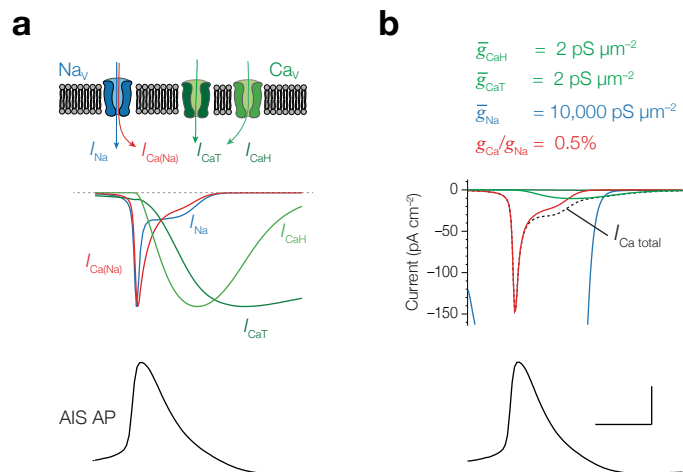

**Figure 8–figure supplement 1.**  $I_{Ca}$  compared to  $I_{Ca(Na)}$  in a single compartment model

Supplement: supp [file elife-54566-supp-v1.zip › elife_poa_e54566_Figure_8_figure_supplement_1.pdf]

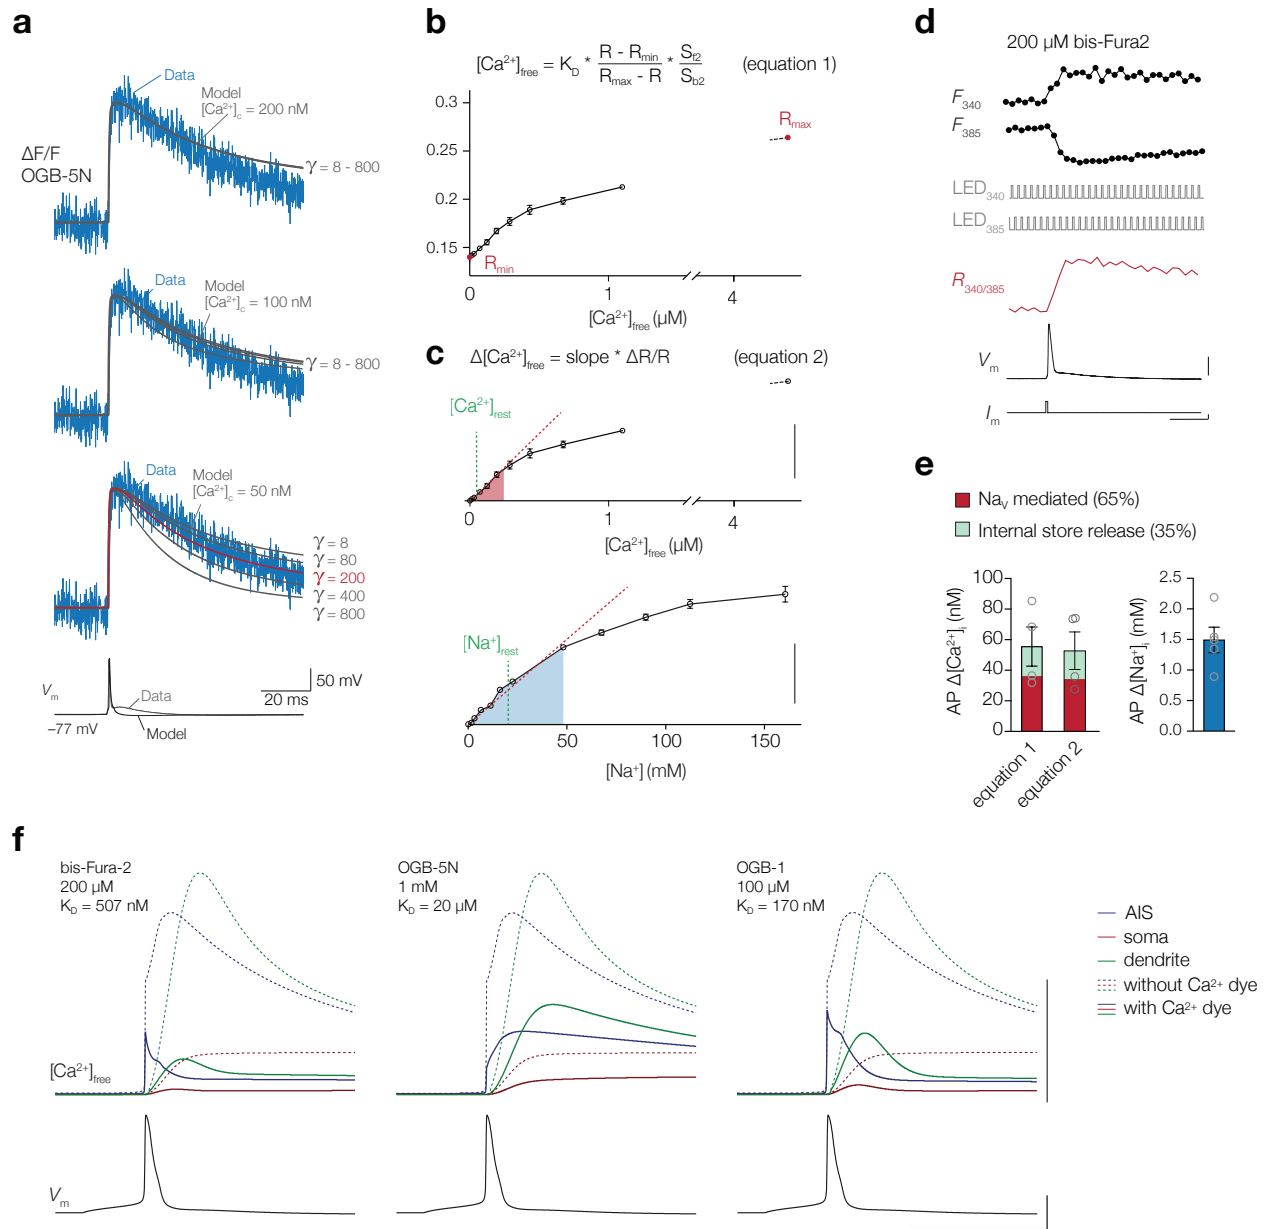

**Figure 8–figure supplement 2. Calibration and modeling of  $[Ca^{2+}]_i$**

Supplement: supp [file elife-54566-supp-v1.zip › elife_poa_e54566_Figure_8_figure_supplement_2.pdf]
